# Supplementary material for: Noise as an informational cue for decision-making: the sound of rain delays bat emergence
Source: Oxford University Press journal article supplement (doi:10.1242/jeb.192005), 2019-01-01
Supplement: jeb192005supp.pdf [file jeb192005supp.pdf]

**Table S1.** Times of emergence for the median bat (medianB) in seconds after sunset (sas) for each treatment for 9 *Micronycteris microtis* and 9 *Molossus molossus* roosts. The median bat was determined as the median bat of the total number of bats that flew out of the roost during the baseline treatment. The three different treatments were: no playback (control, baseline condition), ambient noise, and rain noise.

| Roost ID | Species            | Time of emergence for medianB (sas) |         |      |
|----------|--------------------|-------------------------------------|---------|------|
|          |                    | Treatment                           |         |      |
|          |                    | Baseline                            | Ambient | Rain |
| Roost6   | <i>M. microtis</i> | 427                                 | 495     | 368  |
| Roost7   | <i>M. microtis</i> | 816                                 | 741     | 1278 |
| Roost9   | <i>M. microtis</i> | -85                                 | -180    | 172  |
| Roost10  | <i>M. microtis</i> | -533                                | -427    | -2   |
| Roost11  | <i>M. microtis</i> | 217                                 | 385     | 835  |
| Roost13  | <i>M. microtis</i> | 78                                  | 83      | -558 |
| Roost14  | <i>M. microtis</i> | 362                                 | 338     | 861  |
| Roost15  | <i>M. microtis</i> | 54                                  | 260     | 1143 |
| Roost16  | <i>M. microtis</i> | 600                                 | 633     | 1753 |
| <hr/>    |                    |                                     |         |      |
| Mol1     | <i>M. molossus</i> | 1383                                | 1282    | 2054 |
| Mol2     | <i>M. molossus</i> | 1057                                | 1030    | 1796 |
| Mol3     | <i>M. molossus</i> | 952                                 | 1163    | 1578 |
| Mol4     | <i>M. molossus</i> | 881                                 | 792     | 2443 |
| Mol5     | <i>M. molossus</i> | 1117                                | 930     | 802  |
| Mol6     | <i>M. molossus</i> | 1261                                | 1196    | 1215 |
| Mol9     | <i>M. molossus</i> | 866                                 | 1477    | 1800 |
| Mol10    | <i>M. molossus</i> | 1206                                | 1080    | 2263 |
| Mol11    | <i>M. molossus</i> | 859                                 | 1408    | 1600 |
